# Supplementary material for: Trastuzumab Modulates the Protein Cargo of Extracellular Vesicles Released by ERBB2+ Breast Cancer Cells
Source: Preprints.org preprint supplement (doi:10.20944/preprints202102.0545.v1), 2021-02-24
Supplement: Supplementary file 2 [file supplementary]

| <b>Table S1. Antibodies used in the study.</b> |                       |                     |
|------------------------------------------------|-----------------------|---------------------|
| <b>Antibody</b>                                | <b>Catalog number</b> | <b>Manufacturer</b> |
| Anti-CD63                                      | sc-15363              | Santa Cruz          |
| Anti-CD9                                       | PA5-85955             | Thermofisher        |
| Anti-ALIX                                      | sc-271975             | Santa Cruz          |
| Anti-HSP90                                     | sc-13119              | Santa Cruz          |
| Anti-ErbB2 (Ab20)                              | 120911C               | Thermofisher        |
| Anti-pErbB2 (Tyr1248)                          | 2247                  | Cell signaling      |
| Anti-GAPDH                                     | 14C10                 | Cell signaling      |
| Anti-vinculin                                  | V9131                 | Sigma-Aldrich       |
| Anti-LC3                                       | 100-2220              | Novus Biologicals   |

Table S3. Differentially regulated proteins by Tz treatment in Evs purified from SKBR-3 cells

|         |
|---------|
| PHLDB3  |
| ACVR1B  |
| PPP2R5E |
| ZYX     |
| TWF2    |
| PDCD5   |
| TBCD    |
| RRM2    |
| DNAH7   |
| TCF3    |
| SPTBN2  |
| SHTN1   |
| NT5C2   |
| SMCHD1  |
| NOTCH4  |
| RPL8    |
| LMAN2   |
| F2RL1   |
| EIF3F   |
| ESD     |
| SCIN    |
| FZD6    |
| LRRC8A  |
| ESYT2   |
| ARFGEF2 |
| UBTD1   |
| CIT     |
| TOP1    |
| BTN2A1  |
| PCID2   |
| ZNF544  |
| ANO1    |
| SRSF7   |
| RFC4    |
| RBBP7   |
| RPL13A  |
| PLAA    |
| RUVBL2  |
| CPPED1  |
| PPAP2B  |
| CIAPIN1 |
| GAN     |
| HNRNPM  |
| FAM65C  |
| GUCD1   |
| SLC35F6 |
| RALGPS1 |

GTPBP2  
SPAT  
WASHC5  
SPTBN1

with a statistically significant p-value resulted from Student's T-test. Proteins downregulated



by Tz (and hence upregulated in IgG treated cells ) are highlighted in red while proteins upre



regulated by Tz are highlighted in blue.
