# Supplementary material for: Trastuzumab Modulates the Protein Cargo of Extracellular Vesicles Released by ERBB2+ Breast Cancer Cells
Source: Preprints.org preprint supplement (doi:10.20944/preprints202102.0545.v1), 2021-02-24
Supplement: Supplementary file 3 [file supplementary]

Archive with 2 entries (2 files):
- Supplementary material.pdf
- __MACOSX/._Supplementary material.pdf
